# Supplementary material
Source: HighWire-hosted journal article supplement (http://jmg.bmjjournals.com/highwire/filestream/189600/field_highwire_adjunct_files/0/jmg-2023-109488supp001_data_supplement.pdf)
Supplement: jmg-2023-109488supp001_data_supplement.pdf [file jmg-2023-109488supp001_data_supplement.pdf]

| Cardiogenetics             |                                                                                                                                                        |                                                                                                                                                                                                                                                                                                                                                                                                   |                                                                                                                                                                                                                           |
|----------------------------|--------------------------------------------------------------------------------------------------------------------------------------------------------|---------------------------------------------------------------------------------------------------------------------------------------------------------------------------------------------------------------------------------------------------------------------------------------------------------------------------------------------------------------------------------------------------|---------------------------------------------------------------------------------------------------------------------------------------------------------------------------------------------------------------------------|
| Paper                      | Methods                                                                                                                                                | Results                                                                                                                                                                                                                                                                                                                                                                                           | Clinical implications                                                                                                                                                                                                     |
| Westphal et al., 2022 [64] | Retrospective review of genetic test reports from 2009 – 2019 using 2015 ACMG/AMP guidelines (n=167)                                                   | 126 patients had genetic test reports. 45 variants were identified in 71 patients.<br>13 out of 45 variants were reclassified (28.9%). 9 of the 13 reclassified variants were from VUS to LB*. 3 variants were reclassified from P** to VUS. One variant was reclassified from LB to VUS.                                                                                                         | Management unchanged as patients had clinical diagnoses.                                                                                                                                                                  |
| Cherny et al., 2021 [9]    | Retrospective review of genetic test reports from 2006 – 2017 using ClinVar (n=583)                                                                    | 583 patients from 337 families from had genetic tests. 422 variants out of 914 variants were investigated . 330 variants out of 422 variants that were examined were reclassified (78.1%) after investigation. 9 out of 330 reclassifications (2.7%) were from VUS to P/LP***; 25 out of 330 reclassifications were from P/LP to VUS (7.6%).<br>Overall, 22% of total variants were reclassified. | Approximately 10% of variants had a reclassification that would change clinical interpretation.                                                                                                                           |
| Costa et al., 2021 [3]     | Retrospective review of medical records of patients with clinical diagnoses and genetic testing from 1998 – 2019 using 2015 ACMG/AMP guidelines (n=79) | 79 patients had clinical diagnoses and genetic testing. 80 unique variants were identified on testing. 47 variants out of 80 unique variants were reclassified (58.8%).                                                                                                                                                                                                                           | 33 reclassified variants out of 80 originally classified variants (41.3%) were deemed clinically relevant. 13 family members had familial testing. 5 family members had a variant reclassified from P/LP to VUS or B/LB~. |

| Cardiogenetics             |                                                                                                                                          |                                                                                                                                                                                                                                                                                                                                                                                                                                                                       |                                                                                                                                                                                                                                                                                                                                                                         |
|----------------------------|------------------------------------------------------------------------------------------------------------------------------------------|-----------------------------------------------------------------------------------------------------------------------------------------------------------------------------------------------------------------------------------------------------------------------------------------------------------------------------------------------------------------------------------------------------------------------------------------------------------------------|-------------------------------------------------------------------------------------------------------------------------------------------------------------------------------------------------------------------------------------------------------------------------------------------------------------------------------------------------------------------------|
| Paper                      | Methods                                                                                                                                  | Results                                                                                                                                                                                                                                                                                                                                                                                                                                                               | Clinical implications                                                                                                                                                                                                                                                                                                                                                   |
| Davies et al. 2021 [70]    | Retrospective review of genetic test reports from 2006 – 2017 using 2015 ACMG/AMP guidelines (n=131)                                     | 131 patients had genetic test reports. Of the 340 variants reported on the test reports, 211 were originally classified as B/LB, 36 variants were classified as P/LP, 93 variants were classified as VUS.<br>20 VUS out of 93 VUS were reclassified as B/LB (22%), 7 VUS out of 93 VUS were reclassified as P/LP (8%). Overall, 30% of VUS were reclassified. Out of 23 variants originally classified as P, 5 were reclassified to VUS, 5 were reclassified to B/LB. | 40 patients out of 131 patients (31%) had variant reclassification that was clinically significant.                                                                                                                                                                                                                                                                     |
| Richmond et al., 2021 [16] | Retrospective review of genetic test reports from 2013 – 2017 using 2015 ACMG/AMP guidelines and ClinGen MYH7 specific guidelines (n=52) | 52 patients had genetic tests reporting 54 variants. 43 unique variants were classified on the test reports.<br>17 variants out of 43 unique variants (39%) were reclassified using ACMG/AMP guidelines.<br>13 variants out of 43 unique variants (30%) were reclassified using ClinGen criteria.                                                                                                                                                                     | 19% of variant reclassifications were clinically actionable using ACMG/AMP guidelines.<br>15% of variant reclassifications were clinically actionable using ClinGen criteria.<br>19 proband reports were reclassified using ClinGen criteria. Of the 19 reclassified proband reports, 9 (47%) were issued to families where cascade testing had already been initiated. |

| Cardiogenetics               |                                                                                                                                                                                                           |                                                                                                                                                                                                                                                                                                                                                                                                                             |                                                                                                                                                                        |
|------------------------------|-----------------------------------------------------------------------------------------------------------------------------------------------------------------------------------------------------------|-----------------------------------------------------------------------------------------------------------------------------------------------------------------------------------------------------------------------------------------------------------------------------------------------------------------------------------------------------------------------------------------------------------------------------|------------------------------------------------------------------------------------------------------------------------------------------------------------------------|
| Paper                        | Methods                                                                                                                                                                                                   | Results                                                                                                                                                                                                                                                                                                                                                                                                                     | Clinical implications                                                                                                                                                  |
| VanDyke et al., 2021<br>[74] | Retrospective review of genetic test reports from January 2004 – December 2015 using 2015 ACMG/AMP guidelines (n=237)                                                                                     | 237 patients had genetic test reports. 223 unique variants were identified on the test reports. 79 variants out of 223 unique variants were reclassified (35.4%). 21% of reclassified VUS were downgraded to B/LB; 12% were upgraded to P/LP.                                                                                                                                                                               | Medical management recommendations changed for 38/237 (16%) patients based on variant reclassification.                                                                |
| Quiat et al., 2020<br>[19]   | Retrospective review of medical records of patients with clinical diagnoses from January 2008 – January 2018. Variants reported on genetic tests were reclassified using 2015 ACMG/AMP guidelines (n=118) | 118 patients had a clinical diagnosis. Genetic testing was performed in 63 patients. 116 variants were classified on 63 genetic test reports. 26 VUS of 90 variants that were originally classified as VUS (28.9%) were reclassified as B/LB.                                                                                                                                                                               | Medical management unchanged as patients had clinical diagnoses.                                                                                                       |
| Bennett et al., 2019<br>[66] | Retrospective review of genetic test reports from 2007 – 2017 using 2015 ACMG/AMP guidelines (n=116)                                                                                                      | 116 genetic test reports were reviewed. P/LP and VUS were identified in 47 reports out of 116 reports (40.5%). 24 reports out of 116 reports (20.1%) had VUS classification (23 unique VUS in 12 genes were identified). 45 reports did not show any clinically relevant variants (38.8%). 12 VUS out of 23 unique VUS initially reported were reclassified. 8 VUS were reclassified to P; 4 VUS were reclassified to B/LB. | Medical management unchanged as patients had clinical diagnoses. Predictive genetic testing available for family members of patients who had VUS reclassified to P/LP. |

| Cardiogenetics             |                                                                                                                                                    |                                                                                                                                                                                                                                                                      |                                                                                                                                                                                                                                                                       |
|----------------------------|----------------------------------------------------------------------------------------------------------------------------------------------------|----------------------------------------------------------------------------------------------------------------------------------------------------------------------------------------------------------------------------------------------------------------------|-----------------------------------------------------------------------------------------------------------------------------------------------------------------------------------------------------------------------------------------------------------------------|
| Paper                      | Methods                                                                                                                                            | Results                                                                                                                                                                                                                                                              | Clinical implications                                                                                                                                                                                                                                                 |
| Westphal et al., 2019 [56] | Retrospective review of diagnostic genetic test reports from December 2001 – November 2018 using 2015 ACMG/AMP guidelines (n=127)                  | 127 patients had genetic testing. There were 84 different variants initially classified as P/LP in 127 patients. 12 variants out of 84 unique variants (14.3%) originally reported as P/LP were downgraded to VUS.                                                   | The reclassification of 12 P/LP variants to VUS affected 19 patients. Clinical management outcome of the reclassification not reported.                                                                                                                               |
| Cancer genetics            |                                                                                                                                                    |                                                                                                                                                                                                                                                                      |                                                                                                                                                                                                                                                                       |
| Paper                      | Methods                                                                                                                                            | Results                                                                                                                                                                                                                                                              | Clinical implications                                                                                                                                                                                                                                                 |
| Makhnoon et al., 2023 [6]  | Retrospective review of diagnostic genetic tests reporting VUS from 2013 – 2019. Reclassification reported by the performing laboratory. (n=2,715) | 2,715 patients had a VUS classified on initial genetic test report. 3,261 unique VUS were reported across 2,715 individual patients. 240 VUS out of 3,261 VUS were reclassified (7.36%). 88.7% of VUS were downgraded to B/LB . 11.3% of VUS were upgraded to P/LP . | 11.3% of all reclassified VUS resulted in clinically actionable findings. Clinical management was changed for 125 patients (4.6%).                                                                                                                                    |
| Muir et al., 2022 [72]     | Retrospective chart review to identify reclassified variants that were reported from January 1997 – December 2020 (n=2,503)                        | 2,503 reclassified variants were identified by chart review. 211 out of 2,503 variants were reclassified once (8.4%). 21 of these 211 reclassified variants (9.9%) were then reclassified a second time.                                                             | 21 reclassifications (21/232; 9.1%) led to a change in recommended clinical management. 17 reclassifications changed recommendations for familial testing and screening recommendations. 4 reclassifications led to a change in recommendations for familial testing. |

| Cancer genetics         |                                                                                                                                  |                                                                                                                                                                                                                                                                                                                                                                                                                                                                                                                      |                                                                                                                                                                                                                                                                                             |
|-------------------------|----------------------------------------------------------------------------------------------------------------------------------|----------------------------------------------------------------------------------------------------------------------------------------------------------------------------------------------------------------------------------------------------------------------------------------------------------------------------------------------------------------------------------------------------------------------------------------------------------------------------------------------------------------------|---------------------------------------------------------------------------------------------------------------------------------------------------------------------------------------------------------------------------------------------------------------------------------------------|
| Paper                   | Methods                                                                                                                          | Results                                                                                                                                                                                                                                                                                                                                                                                                                                                                                                              | Clinical implications                                                                                                                                                                                                                                                                       |
| Chiang et al., 2021 [7] | Retrospective review of diagnostic genetic test reports from February 2014 – March 2020 using 2015 ACMG/AMP guidelines (n=1,695) | 1,695 patients underwent diagnostic genetic testing. 1,412 unique variants were classified on initial genetic reports. 94 variants out of 1,412 variants (6.7%) were reclassified. Of the 94 variants that were reclassified, 85 VUS and 9 P/LP variants were reclassified. No B/LB variants were reclassified. 80 VUS out of 85 VUS (94%) were reclassified as B/LB. 5 VUS were reclassified as P/LP (5.9%). 6 P/LP reclassifications out of 9 P/LP variants were reclassified within the same pathogenic category. | 99 patients had a variant detected on initial genetic testing reclassified. Variant reclassification affected clinical management in 12 patients out of 99 patients (12.1%) who had a VUS reclassified. 2 patients were started on targeted therapy based on reclassification of their VUS. |
| Ha et al., 2020 [68]    | Retrospective review of genetic test reports from January 2006 – August 2018 using 2015 ACMG/AMP guidelines (n=805)              | 805 patients had genetic testing. 108 unique VUS were reported on initial classification. Of the VUS that were reclassified, 6 VUS were reclassified as P/LP (5.6%), 30 VUS were reclassified as B/LB (27.8%), 72 VUS were not reclassified (66.7%).                                                                                                                                                                                                                                                                 | Not reported.                                                                                                                                                                                                                                                                               |
| So et al., 2019 [67]    | Retrospective review of genetic tests reports from 2010 – 2017 using 2015 ACMG/AMP guidelines (n=423)                            | 75 patients out of 423 had a VUS reported on initial classification. 32 patients out of 75 patients had a VUS reclassified (43.7%): 2 patients had VUS reclassified to LP; 8 patients had VUS reclassified to B; 22 patients had VUS reclassified to LB.                                                                                                                                                                                                                                                             | 30 patients who were initially reported to have a VUS out of 75 patients reported to have a VUS (40%) were discharged from medical surveillance following reclassification.                                                                                                                 |

| Cancer genetics              |                                                                                                                                                    |                                                                                                                                                                                                                                                                           |                                                                                                                                                                                                                 |
|------------------------------|----------------------------------------------------------------------------------------------------------------------------------------------------|---------------------------------------------------------------------------------------------------------------------------------------------------------------------------------------------------------------------------------------------------------------------------|-----------------------------------------------------------------------------------------------------------------------------------------------------------------------------------------------------------------|
| Paper                        | Methods                                                                                                                                            | Results                                                                                                                                                                                                                                                                   | Clinical implications                                                                                                                                                                                           |
| Macklin et al., 2018<br>[2]  | Retrospective review of variant reclassifications reported to a clinic by a testing laboratory between September 2013 – February 2017<br>(n=1,103) | 40 genetic test results out of 1,103 (3.6%) were reclassified. 29 VUS out of 226 VUS (72.5%) were reclassified as LB. 2 P/LP variants were reclassified to VUS. 1 VUS was reclassified as LP. 6 variants were classified within their pathogenicity class (e.g. LB to B). | 3 of 40 reclassifications (7.5%) altered medical management for patients.                                                                                                                                       |
| Neurogenetics                |                                                                                                                                                    |                                                                                                                                                                                                                                                                           |                                                                                                                                                                                                                 |
| Paper                        | Methods                                                                                                                                            | Results                                                                                                                                                                                                                                                                   | Clinical implications                                                                                                                                                                                           |
| Charnay et al., 2021<br>[63] | Retrospective analysis of variants reported from 2001 – 2020 using 2015 ACMG/AMP guidelines<br>(n=176)                                             | 17 variants (9.7%) initially classified as pathogenic were reclassified to VUS or B/LB.                                                                                                                                                                                   | Not reported.                                                                                                                                                                                                   |
| SoRelle et al., 2019<br>[5]  | Retrospective review of genetic test reports from July 2012 – August 2015 using 2015 ACMG/AMP guidelines<br>(n=185)                                | VUS were reported in 124 patients, 46 of these VUS (37.1%) were downgraded to B/LB on reclassification; 19 P/LP variants were downgraded in pathogenicity; two VUS were upgraded to P/LP.                                                                                 | 67 patients out of 185 patients (36.2%) had a reclassified variant. Of the 67 patients who had a variant reclassified, 21 (31.3%) patients experienced a change in diagnosis based on variant reclassification. |

| Eye diseases           |                                                                                                                  |                                                                                         |                                                                  |
|------------------------|------------------------------------------------------------------------------------------------------------------|-----------------------------------------------------------------------------------------|------------------------------------------------------------------|
| Paper                  | Methods                                                                                                          | Results                                                                                 | Clinical implications                                            |
| Chan et al., 2023 [65] | Retrospective review of genetic test reports from January 2006 – July 2022 using 2015 ACMG/AMP guidelines (n=53) | 2 VUS out of 10 VUS reported on initial classification (20%) were reclassified to P/LP. | Medical management unchanged as patients had clinical diagnoses. |

Supplementary Table: **Summary of sequence variant reclassification literature.** The literature describing variant reclassification demonstrates diverse results, underscoring the current element of uncertainty that exists in variant reclassification.

\* LB = likely benign; \*\* P = pathogenic; \*\*\* P/LP = pathogenic/likely pathogenic; ~ B/LB = benign/likely benign; ~~ LP = likely pathogenic; ~~~ B = Benign
